# Supplementary material
Source: ML conference proceedings conference paper supplement (https://proceedings.neurips.cc/paper_files/paper/2019/hash/af3b6a54e9e9338abc54258e3406e485-Abstract.html)
Supplement: Supplementary file [file af3b6a54e9e9338abc54258e3406e485-Supplemental.zip]

---

# Supplementary Material: Towards Practical Alternating Least-Squares for CCA

---

**Zhiqiang Xu and Ping Li**

Cognitive Computing Lab  
Baidu Research

No.10 Xibeiwang East Road, Beijing, 10085, China  
10900 NE 8th St, Bellevue, WA 98004, USA  
{xuzhiqiang04, liping11}@baidu.com

**Notations** Assume that  $r = r(\mathbf{C})$ , where  $r(\cdot)$  represents the rank of a matrix. Let  $(\mathbf{u}_i, \mathbf{v}_i, \sigma_i)$  be the  $i$ -th largest singular value triplet of  $\mathbf{C}$ ,  $1 \leq i \leq r \leq \min\{d_x, d_y\}$ , where  $\sigma_i$  represents the  $i$ -th largest singular value and  $\mathbf{u}_i, \mathbf{v}_i$  represents the corresponding left and right singular vectors of unit length in the sense that  $\mathbf{u}_i^\top \mathbf{C}_{xx} \mathbf{u}_i = \mathbf{v}_i^\top \mathbf{C}_{yy} \mathbf{v}_i = 1$ , respectively. Denote for  $1 \leq k \leq r$  that

$$\begin{aligned} \mathbf{U} &= (\mathbf{u}_1, \dots, \mathbf{u}_k), \quad \mathbf{\Sigma} = \text{diag}(\sigma_1, \dots, \sigma_k), \quad \mathbf{V} = (\mathbf{v}_1, \dots, \mathbf{v}_k), \\ \mathbf{U}_\perp &= (\mathbf{u}_{k+1}, \dots, \mathbf{u}_r), \mathbf{\Sigma}_\perp = \text{diag}(\sigma_{k+1}, \dots, \sigma_r), \mathbf{V}_\perp = (\mathbf{v}_{k+1}, \dots, \mathbf{v}_r). \end{aligned}$$

We then have that

$$\mathbf{C}_{xy} = \mathbf{C}_{xx}(\mathbf{U}\mathbf{\Sigma}\mathbf{V}^\top + \mathbf{U}_\perp\mathbf{\Sigma}_\perp\mathbf{V}_\perp^\top)\mathbf{C}_{yy}, \quad (1)$$

where

$$\begin{aligned} \mathbf{U}^\top \mathbf{C}_{xx} \mathbf{U} &= \mathbf{I}, & \mathbf{U}_\perp^\top \mathbf{C}_{xx} \mathbf{U}_\perp &= \mathbf{I}, \\ \mathbf{V}^\top \mathbf{C}_{yy} \mathbf{V} &= \mathbf{I}, & \mathbf{V}_\perp^\top \mathbf{C}_{yy} \mathbf{V}_\perp &= \mathbf{I}, \\ \mathbf{U}^\top \mathbf{C}_{xx} \mathbf{U}_\perp &= \mathbf{0}, & \mathbf{V}^\top \mathbf{C}_{yy} \mathbf{V}_\perp &= \mathbf{0}. \end{aligned}$$

**Theorem 1** Given data matrices  $\mathbf{X}$  and  $\mathbf{Y}$ , TALS-CCA computes a  $d_x \times k$  matrix  $\mathbf{\Phi}_T$  and a  $d_y \times k$  matrix  $\mathbf{\Psi}_T$  which are estimates of top- $k$  canonical subspaces  $(\mathbf{U}, \mathbf{V})$  with an error of  $\epsilon$ , i.e.,  $\mathbf{\Phi}_T^\top \mathbf{C}_{xx} \mathbf{\Phi}_T = \mathbf{\Psi}_T^\top \mathbf{C}_{yy} \mathbf{\Psi}_T = \mathbf{I}$  and  $\tan \theta_T \leq \epsilon$ , in  $T = O(\frac{\sigma_k^2}{\sigma_k^2 - \sigma_{k+1}^2} \log \frac{1}{\epsilon \cos \theta_0})$  iterations. If Nesterov's accelerated gradient descent is used as the least-squares solver, the running time is at most

$$\begin{aligned} O\left(\frac{k\sigma_k^2}{\sigma_k^2 - \sigma_{k+1}^2} \text{nnz}(\mathbf{X}, \mathbf{Y}) \kappa(\mathbf{X}, \mathbf{Y}) \left(\log \frac{1}{\cos \theta_0} \log \frac{\sigma_1}{(\sigma_k^2 - \sigma_{k+1}^2) \cos \theta_0} + \right. \right. \\ \left. \left. \log \frac{1}{\epsilon} \log \frac{\sigma_1}{\sigma_k^2 - \sigma_{k+1}^2}\right) + \frac{k^2 \sigma_k^2}{\sigma_k^2 - \sigma_{k+1}^2} \max\{d_x, d_y\} \log \frac{1}{\epsilon \cos \theta_0}\right), \end{aligned}$$

where  $\text{nnz}(\mathbf{X}, \mathbf{Y}) = \text{nnz}(\mathbf{X}) + \text{nnz}(\mathbf{Y})$  and  $\kappa(\mathbf{X}, \mathbf{Y}) = \max\{\kappa(\mathbf{C}_{xx}), \kappa(\mathbf{C}_{yy})\}$ .

**Proof** We follow the analysis of [1] closely. To analyze  $\tan \theta_{t+1}$ , we focus on  $\tan \theta_{\max}(\mathbf{\Phi}_{t+1}, \mathbf{U})$  and the case of  $\tan \theta_{\max}(\mathbf{\Psi}_{t+1}, \mathbf{V})$  is analogous. The coupled and inexact update equations of our TALS are as follows,

$$\begin{cases} \tilde{\mathbf{\Phi}}_{t+1} = \mathbf{C}_{xx}^{-1} \mathbf{C}_{xy} \mathbf{\Psi}_t + \xi_t, & \mathbf{\Phi}_{t+1} = \tilde{\mathbf{\Phi}}_{t+1} \mathbf{R}_{t+1} \\ \tilde{\mathbf{\Psi}}_{t+1} = \mathbf{C}_{yy}^{-1} \mathbf{C}_{xy}^\top \mathbf{\Phi}_{t+1} + \eta_{t+1}, & \mathbf{\Psi}_{t+1} = \tilde{\mathbf{\Psi}}_{t+1} \mathbf{S}_{t+1} \end{cases},$$

where  $\mathbf{R}_{t+1} = (\tilde{\mathbf{\Phi}}_{t+1}^\top \mathbf{C}_{xx} \tilde{\mathbf{\Phi}}_{t+1})^{-\frac{1}{2}}$  and  $\mathbf{S}_{t+1} = (\tilde{\mathbf{\Psi}}_{t+1}^\top \mathbf{C}_{yy} \tilde{\mathbf{\Psi}}_{t+1})^{-\frac{1}{2}}$ . Particularly, we assume that

$$\max\{\|\xi_t\|_{\mathbf{C}_{xx}, F}, \|\eta_t\|_{\mathbf{C}_{yy}, F}\} \leq \frac{\sigma_k^2 - \sigma_{k+1}^2}{12} \min\{\sin \theta_t, \cos \theta_t\}. \quad (2)$$

By Lemma 1, we then have that

$$\tan \theta_{\max}(\Phi_{t+1}, \mathbf{U}) = \|\mathbf{U}_{\perp}^{\top} \mathbf{C}_{xx} \Phi_{t+1} (\mathbf{U}^{\top} \mathbf{C}_{xx} \Phi_{t+1})^{-1}\|_2.$$

To proceed, note that

$$\Phi_{t+1} = (\mathbf{C}_{xx}^{-1} \mathbf{C}_{xy} (\mathbf{C}_{yy}^{-1} \mathbf{C}_{xy}^{\top} \Phi_t + \eta_t) \mathbf{S}_t + \xi_t) \mathbf{R}_{t+1}. \quad (3)$$

Using Eq. (1), we have

$$\begin{aligned} \mathbf{C}_{xy} \mathbf{C}_{yy}^{-1} \mathbf{C}_{xy}^{\top} &= \mathbf{C}_{xx} (\mathbf{U} \Sigma \mathbf{V}^{\top} + \mathbf{U}_{\perp} \Sigma_{\perp} \mathbf{V}_{\perp}^{\top}) \mathbf{C}_{yy} (\mathbf{V} \Sigma \mathbf{U}^{\top} + \mathbf{V}_{\perp} \Sigma_{\perp} \mathbf{U}_{\perp}^{\top}) \mathbf{C}_{xx} \\ &= \mathbf{C}_{xx} (\mathbf{U} \Sigma^2 \mathbf{U}^{\top} + \mathbf{U}_{\perp} \Sigma_{\perp}^2 \mathbf{U}_{\perp}^{\top}) \mathbf{C}_{xx}. \end{aligned}$$

Accordingly, one gets that

$$\mathbf{U}_{\perp}^{\top} \mathbf{C}_{xx} \Phi_{t+1} = (\Sigma_{\perp}^2 \mathbf{U}_{\perp}^{\top} \mathbf{C}_{xx} \Phi_t \mathbf{S}_t + \mathbf{U}_{\perp}^{\top} \mathbf{C}_{xy} \eta_t \mathbf{S}_t + \mathbf{U}_{\perp}^{\top} \mathbf{C}_{xx} \xi_t) \mathbf{R}_{t+1},$$

$$\mathbf{U}^{\top} \mathbf{C}_{xx} \Phi_{t+1} = (\Sigma^2 \mathbf{U}^{\top} \mathbf{C}_{xx} \Phi_t \mathbf{S}_t + \mathbf{U}^{\top} \mathbf{C}_{xy} \eta_t \mathbf{S}_t + \mathbf{U}^{\top} \mathbf{C}_{xx} \xi_t) \mathbf{R}_{t+1}.$$

Thus, we can write that

$$\begin{aligned} &\tan \theta_{\max}(\Phi_{t+1}, \mathbf{U}) \\ &= \frac{\|(\Sigma_{\perp}^2 \mathbf{U}_{\perp}^{\top} \mathbf{C}_{xx} \Phi_t \mathbf{S}_t + \mathbf{U}_{\perp}^{\top} \mathbf{C}_{xy} \eta_t \mathbf{S}_t + \mathbf{U}_{\perp}^{\top} \mathbf{C}_{xx} \xi_t) \cdot (\Sigma^2 \mathbf{U}^{\top} \mathbf{C}_{xx} \Phi_t \mathbf{S}_t + \mathbf{U}^{\top} \mathbf{C}_{xy} \eta_t \mathbf{S}_t + \mathbf{U}^{\top} \mathbf{C}_{xx} \xi_t)^{-1}\|_2}{\sigma_{\min}(\Sigma^2 + \mathbf{U}^{\top} \mathbf{C}_{xy} \eta_t \mathbf{S}_t (\mathbf{U}^{\top} \mathbf{C}_{xx} \Phi_t \mathbf{S}_t)^{-1} + \mathbf{U}^{\top} \mathbf{C}_{xx} \xi_t (\mathbf{U}^{\top} \mathbf{C}_{xx} \Phi_t \mathbf{S}_t)^{-1})} \\ &\leq \frac{\|(\Sigma_{\perp}^2 \mathbf{U}_{\perp}^{\top} \mathbf{C}_{xx} \Phi_t \mathbf{S}_t + \mathbf{U}_{\perp}^{\top} \mathbf{C}_{xy} \eta_t \mathbf{S}_t + \mathbf{U}_{\perp}^{\top} \mathbf{C}_{xx} \xi_t) (\mathbf{U}^{\top} \mathbf{C}_{xx} \Phi_t \mathbf{S}_t)^{-1}\|_2}{\sigma_{\min}(\Sigma^2 + \mathbf{U}^{\top} \mathbf{C}_{xy} \eta_t \mathbf{S}_t (\mathbf{U}^{\top} \mathbf{C}_{xx} \Phi_t \mathbf{S}_t)^{-1} + \mathbf{U}^{\top} \mathbf{C}_{xx} \xi_t (\mathbf{U}^{\top} \mathbf{C}_{xx} \Phi_t \mathbf{S}_t)^{-1})} \\ &\leq \frac{\|\Sigma_{\perp}^2 \mathbf{U}_{\perp}^{\top} \mathbf{C}_{xx} \Phi_t (\mathbf{U}^{\top} \mathbf{C}_{xx} \Phi_t)^{-1}\|_2 + (\|\mathbf{U}_{\perp}^{\top} \mathbf{C}_{xy} \eta_t\|_2 + \|\mathbf{U}_{\perp}^{\top} \mathbf{C}_{xx} \xi_t\|_2 \|\mathbf{S}_t^{-1}\|_2) \|(\mathbf{U}^{\top} \mathbf{C}_{xx} \Phi_t)^{-1}\|_2}{\sigma_{\min}(\Sigma^2) - (\|\mathbf{U}^{\top} \mathbf{C}_{xy} \eta_t\|_2 + \|\mathbf{U}^{\top} \mathbf{C}_{xx} \xi_t\|_2 \|\mathbf{S}_t^{-1}\|_2) \|(\mathbf{U}^{\top} \mathbf{C}_{xx} \Phi_t)^{-1}\|_2}. \end{aligned}$$

In the last inequality, we have that

$$\|(\mathbf{U}^{\top} \mathbf{C}_{xx} \Phi_t)^{-1}\|_2 = \cos^{-1} \theta_{\max}(\Phi_t, \mathbf{U}),$$

and

$$\begin{aligned} \|\Sigma_{\perp}^2 \mathbf{U}_{\perp}^{\top} \mathbf{C}_{xx} \Phi_t (\mathbf{U}^{\top} \mathbf{C}_{xx} \Phi_t)^{-1}\|_2 &\leq \|\Sigma_{\perp}^2\|_2 \|\mathbf{U}_{\perp}^{\top} \mathbf{C}_{xx} \Phi_t (\mathbf{U}^{\top} \mathbf{C}_{xx} \Phi_t)^{-1}\|_2 \\ &= \sigma_{k+1}^2 \tan \theta_{\max}(\Phi_t, \mathbf{U}), \end{aligned}$$

$$\|\mathbf{U}^{\top} \mathbf{C}_{xx} \xi_t\|_2 \leq \|\xi_t\|_{\mathbf{C}_{xx}}, \quad \|\mathbf{U}_{\perp}^{\top} \mathbf{C}_{xx} \xi_t\|_2 \leq \|\xi_t\|_{\mathbf{C}_{xx}},$$

$$\|\mathbf{U}^{\top} \mathbf{C}_{xy} \eta_t\|_2 \leq \sigma_1 \|\eta_t\|_{\mathbf{C}_{yy}}, \quad \|\mathbf{U}_{\perp}^{\top} \mathbf{C}_{xy} \eta_t\|_2 \leq \sigma_{k+1} \|\eta_t\|_{\mathbf{C}_{yy}},$$

where the last four inequalities are due to Eq. (1) as well as  $\|\xi_t\|_{\mathbf{C}_{xx}} = \|\mathbf{C}_{xx}^{1/2} \xi_t\|_2$ . In addition,

$$\begin{aligned} \|\mathbf{S}_t^{-1}\|_2 &= \|(\tilde{\Psi}_t^{\top} \mathbf{C}_{yy} \tilde{\Psi}_t)^{1/2}\|_2 = \|\mathbf{C}_{yy}^{1/2} (\mathbf{C}_{yy}^{-1} \mathbf{C}_{xy}^{\top} \Phi_t + \eta_t)\|_2 \\ &\leq \sigma_1 + \|\eta_t\|_{\mathbf{C}_{yy}}. \end{aligned}$$

We thus obtain that

$$\begin{aligned} &\tan \theta_{\max}(\Phi_{t+1}, \mathbf{U}) \\ &\leq \frac{\sigma_{k+1}^2 \tan \theta_{\max}(\Phi_t, \mathbf{U}) + \frac{\sigma_{k+1} \|\eta_t\|_{\mathbf{C}_{yy}} + (\sigma_1 + \|\eta_t\|_{\mathbf{C}_{yy}}) \|\xi_t\|_{\mathbf{C}_{xx}}}{\cos \theta_{\max}(\Phi_t, \mathbf{U})}}{\sigma_k^2 - \frac{\sigma_1 \|\eta_t\|_{\mathbf{C}_{yy}} + (\sigma_1 + \|\eta_t\|_{\mathbf{C}_{yy}}) \|\xi_t\|_{\mathbf{C}_{xx}}}{\cos \theta_{\max}(\Phi_t, \mathbf{U})}} \\ &\leq \frac{\sigma_{k+1}^2 \tan \theta_t + \frac{\sigma_{k+1} \|\eta_t\|_{\mathbf{C}_{yy}} + (\sigma_1 + \|\eta_t\|_{\mathbf{C}_{yy}}) \|\xi_t\|_{\mathbf{C}_{xx}}}{\cos \theta_t}}{\sigma_k^2 - \frac{\sigma_1 \|\eta_t\|_{\mathbf{C}_{yy}} + (\sigma_1 + \|\eta_t\|_{\mathbf{C}_{yy}}) \|\xi_t\|_{\mathbf{C}_{xx}}}{\cos \theta_t}} \\ &\leq \frac{\sigma_{k+1}^2 + \frac{\sigma_{k+1} \|\eta_t\|_{\mathbf{C}_{yy}} + (\sigma_1 + \|\eta_t\|_{\mathbf{C}_{yy}}) \|\xi_t\|_{\mathbf{C}_{xx}}}{\sin \theta_t}}{\sigma_k^2 - \frac{\sigma_1 \|\eta_t\|_{\mathbf{C}_{yy}} + (\sigma_1 + \|\eta_t\|_{\mathbf{C}_{yy}}) \|\xi_t\|_{\mathbf{C}_{xx}}}{\cos \theta_t}} \cdot \tan \theta_t \end{aligned}$$

$$\begin{aligned}
&\leq \frac{\sigma_{k+1}^2 + (2\sigma_1 + \frac{\sigma_k^2 - \sigma_{k+1}^2}{12}) \frac{\sigma_k^2 - \sigma_{k+1}^2}{12}}{\sigma_k^2 - (2\sigma_1 + \frac{\sigma_k^2 - \sigma_{k+1}^2}{12}) \frac{\sigma_k^2 - \sigma_{k+1}^2}{12}} \tan \theta_t \quad (\text{by Eq. (2)}) \\
&\leq \frac{\sigma_{k+1}^2 + \frac{\sigma_k^2 - \sigma_{k+1}^2}{4}}{\sigma_k^2 - \frac{\sigma_k^2 - \sigma_{k+1}^2}{4}} \tan \theta_t \quad (\text{due to } \sigma_1 \leq 1) \\
&= \frac{\sigma_k^2 + 3\sigma_{k+1}^2}{3\sigma_k^2 + \sigma_{k+1}^2} \tan \theta_t \\
&\leq \exp\{-\frac{\sigma_k^2 - \sigma_{k+1}^2}{2\sigma_k^2}\} \tan \theta_t.
\end{aligned}$$

Similarly, we have

$$\tan \theta_{\max}(\Psi_{t+1}, \mathbf{V}) \leq \exp\{-\frac{\sigma_k^2 - \sigma_{k+1}^2}{2\sigma_k^2}\} \tan \theta_t.$$

Taking the maximum over the left hand sides of the last two inequalities above, we arrive at

$$\tan \theta_{t+1} \leq \exp\{-\frac{\sigma_k^2 - \sigma_{k+1}^2}{2\sigma_k^2}\} \tan \theta_t,$$

and hence

$$\tan \theta_T \leq \exp\{-\frac{\sigma_k^2 - \sigma_{k+1}^2}{2\sigma_k^2} \cdot T\} \tan \theta_0 \triangleq \Xi,$$

Letting  $\Xi = \epsilon$ , i.e.,

$$T = O(\frac{\sigma_k^2}{\sigma_k^2 - \sigma_{k+1}^2} \log \frac{\tan \theta_0}{\epsilon}) = O(\frac{\sigma_k^2}{\sigma_k^2 - \sigma_{k+1}^2} \log \frac{1}{\epsilon \cos \theta_0}),$$

we obtain that  $\tan \theta_T \leq \epsilon$ . For subproblems, by Lemma 2, we have that

$$\begin{aligned}
\log \frac{\epsilon_{t+1}(\tilde{\Phi}_0)}{\epsilon_{t+1}(\tilde{\Phi}_{t+1})} &= \log \frac{2\epsilon_{t+1}(\tilde{\Phi}_0)}{\|\xi_t\|_{\mathbf{C}_{xx}, F}^2} \\
&= O(\log \frac{4k\sigma_1^2 \tan^2 \theta_t}{(\frac{\sigma_k^2 - \sigma_{k+1}^2}{12} \min\{\sin \theta_t, \cos \theta_t\})^2}) \\
&= O(\log \frac{\sigma_1}{\sigma_k^2 - \sigma_{k+1}^2} + \iota(\theta_t)),
\end{aligned}$$

where

$$\iota(\theta_t) = O(\log \max\{\frac{1}{\cos^2 \theta_t}, \frac{\sin^2 \theta_t}{\cos^4 \theta_t}\}) = \begin{cases} O(\log \frac{1}{\cos \theta_0}), & \theta_t \text{ is large} \\ O(1), & \theta_t \text{ is small} \end{cases}.$$

The same equality holds for  $\log \frac{\epsilon_{t+1}(\tilde{\Psi}_0)}{\epsilon_{t+1}(\tilde{\Psi}_{t+1})}$ . Finally, following [1], a two-phase analysis of the running time based on  $\theta_t$  yields the following total complexity

$$\begin{aligned}
O(\frac{k\sigma_k^2}{\sigma_k^2 - \sigma_{k+1}^2} \text{nnz}(\mathbf{X}, \mathbf{Y}) \kappa(\mathbf{X}, \mathbf{Y}) (\log \frac{1}{\cos \theta_0} \log \frac{\sigma_1}{(\sigma_k^2 - \sigma_{k+1}^2) \cos \theta_0} + \\
\log \frac{1}{\epsilon} \log \frac{\sigma_1}{\sigma_k^2 - \sigma_{k+1}^2}) + \frac{dk^2\sigma_k^2}{\sigma_k^2 - \sigma_{k+1}^2} \log \frac{1}{\epsilon \cos \theta_0}),
\end{aligned}$$

where  $\text{nnz}(\mathbf{X}, \mathbf{Y}) = \text{nnz}(\mathbf{X}) + \text{nnz}(\mathbf{Y})$  and  $\kappa(\mathbf{X}, \mathbf{Y}) = \max\{\kappa(\mathbf{C}_{xx}), \kappa(\mathbf{C}_{yy})\}$ .  $\square$

**Remark** Note that the recurrence equation (3) differs from those in [2] and [1] where  $\Phi_{t+1}$  is a function of  $\Phi_{t-1}$  instead of  $\Phi_t$ .

**Theorem 2** Given data matrices  $\mathbf{X}$  and  $\mathbf{Y}$ , FastTALS-CCA computes a  $d_x \times k$  matrix  $\Phi_T$  and a  $d_y \times k$  matrix  $\Psi_T$  which are estimates of top- $k$  canonical subspaces ( $\mathbf{U}, \mathbf{V}$ ) with an error of  $\epsilon$ , i.e.,  $\Phi_T^\top \mathbf{C}_{xx} \Phi_T = \Psi_T^\top \mathbf{C}_{yy} \Psi_T = \mathbf{I}$  and  $\tan \theta_T \leq \epsilon$ , in  $T = O(\frac{\sigma_k^2 - c\sigma_1\beta}{\sigma_k^2 - \sigma_{k+1}^2 - 4c\sigma_1\beta} \log \frac{1}{\epsilon \cos \theta_0})$  iterations if  $\theta_0 \leq \frac{\pi}{4}$ . If Nesterov's accelerated gradient descent is used as the least-squares solver, the running time is at most

$$O\left(\frac{k(\sigma_k^2 - c\sigma_1\beta)}{\sigma_k^2 - \sigma_{k+1}^2 - 4c\sigma_1\beta} \text{nnz}(\mathbf{X}, \mathbf{Y}) \kappa(\mathbf{X}, \mathbf{Y}) \left(\log \frac{1}{\cos \theta_0} \log \frac{\sigma_1}{(\sigma_k^2 - \sigma_{k+1}^2) \cos \theta_0} + \log \frac{1}{\epsilon} \log \frac{\sigma_1}{\sigma_k^2 - \sigma_{k+1}^2}\right) + \frac{k^2(\sigma_k^2 - c\sigma_1\beta)}{\sigma_k^2 - \sigma_{k+1}^2 - 4c\sigma_1\beta} \max\{d_x, d_y\} \log \frac{1}{\epsilon \cos \theta_0}\right),$$

where  $c > 0$  is a constant.

**Proof** We only give key steps of the proof as the remainder is the same as above. Let  $\tilde{\theta}_t \triangleq \theta_{\max}(\Phi_t, \mathbf{U})$ . The coupled and inexact update equations are as follows:

$$\begin{cases} \tilde{\Phi}_{t+1} = \mathbf{C}_{xx}^{-1} \mathbf{C}_{xy} \Psi_t - \beta \Phi_{t-1} + \xi_t, & \Phi_{t+1} = \tilde{\Phi}_{t+1} \mathbf{R}_{t+1} \\ \tilde{\Psi}_{t+1} = \mathbf{C}_{yy}^{-1} \mathbf{C}_{xy}^\top \Phi_{t+1} - \beta \Psi_t + \eta_{t+1}, & \Psi_{t+1} = \tilde{\Psi}_{t+1} \mathbf{S}_{t+1} \end{cases}.$$

We then have that

$$\Phi_{t+1} = (\mathbf{C}_{xx}^{-1} \mathbf{C}_{xy} (\mathbf{C}_{yy}^{-1} \mathbf{C}_{xy}^\top \Phi_t - \beta \Psi_{t-1} + \eta_t) \mathbf{S}_t - \beta \Phi_{t-1} + \xi_t) \mathbf{R}_{t+1}. \quad (4)$$

One then gets that

$$\mathbf{U}_\perp^\top \mathbf{C}_{xx} \Phi_{t+1} = (\Sigma_\perp^2 \mathbf{U}_\perp^\top \mathbf{C}_{xx} \Phi_t \mathbf{S}_t - \beta \mathbf{U}_\perp^\top \mathbf{C}_{xy} \Psi_{t-1} + \mathbf{U}_\perp^\top \mathbf{C}_{xy} \eta_t \mathbf{S}_t - \beta \mathbf{U}_\perp^\top \mathbf{C}_{xx} \Phi_{t-1} + \mathbf{U}_\perp^\top \mathbf{C}_{xx} \xi_t) \mathbf{R}_{t+1},$$

$$\mathbf{U}^\top \mathbf{C}_{xx} \Phi_{t+1} = (\Sigma^2 \mathbf{U}^\top \mathbf{C}_{xx} \Phi_t \mathbf{S}_t - \beta \mathbf{U}^\top \mathbf{C}_{xy} \Psi_{t-1} + \mathbf{U}^\top \mathbf{C}_{xy} \eta_t \mathbf{S}_t - \beta \mathbf{U}^\top \mathbf{C}_{xx} \Phi_{t-1} + \mathbf{U}^\top \mathbf{C}_{xx} \xi_t) \mathbf{R}_{t+1}.$$

There is a certain numerical constant  $c$  such that  $\sin \tilde{\theta}_{t-1} \leq c \sin \tilde{\theta}_t$  for a finite  $t$ . We can write that

$$\begin{aligned} & \tan \tilde{\theta}_{t+1} \\ & \leq \frac{\|(\Sigma_\perp^2 \mathbf{U}_\perp^\top \mathbf{C}_{xx} \Phi_t \mathbf{S}_t - \beta \mathbf{U}_\perp^\top \mathbf{C}_{xy} \Psi_{t-1} + \mathbf{U}_\perp^\top \mathbf{C}_{xy} \eta_t \mathbf{S}_t - \beta \mathbf{U}_\perp^\top \mathbf{C}_{xx} \Phi_{t-1} + \mathbf{U}_\perp^\top \mathbf{C}_{xx} \xi_t)(\mathbf{U}^\top \mathbf{C}_{xx} \Phi_t \mathbf{S}_t)^{-1}\|_2}{\sigma_{\min}(\Sigma^2 + (-\beta \mathbf{U}^\top \mathbf{C}_{xy} \Psi_{t-1} + \mathbf{U}^\top \mathbf{C}_{xy} \eta_t \mathbf{S}_t - \beta \mathbf{U}^\top \mathbf{C}_{xx} \Phi_{t-1} + \mathbf{U}^\top \mathbf{C}_{xx} \xi_t)(\mathbf{U}^\top \mathbf{C}_{xx} \Phi_t \mathbf{S}_t)^{-1})} \\ & \leq \frac{\sigma_{k+1}^2 \tan \tilde{\theta}_t + \frac{\beta \sigma_{k+1} \sin \tilde{\theta}_{t-1} + \beta(\sigma_1 + \beta + \|\eta_t\|_{\mathbf{C}_{yy}}) \sin \tilde{\theta}_{t-1} + \sigma_{k+1} \|\eta_t\|_{\mathbf{C}_{yy}} + (\sigma_1 + \beta + \|\eta_t\|_{\mathbf{C}_{yy}}) \|\xi_t\|_{\mathbf{C}_{xx}}}{\cos \tilde{\theta}_t}}{\sigma_k^2 - \frac{\beta \sigma_1 \sin \tilde{\theta}_{t-1} + \beta(\sigma_1 + \beta + \|\eta_t\|_{\mathbf{C}_{yy}}) \sin \tilde{\theta}_{t-1} + \sigma_1 \|\eta_t\|_{\mathbf{C}_{yy}} + (\sigma_1 + \beta + \|\eta_t\|_{\mathbf{C}_{yy}}) \|\xi_t\|_{\mathbf{C}_{xx}}}{\cos \tilde{\theta}_t}} \\ & \leq \frac{\sigma_{k+1}^2 \tan \tilde{\theta}_t + \frac{c\beta \sigma_{k+1} \sin \tilde{\theta}_t + c\beta(\sigma_1 + \beta + \|\eta_t\|_{\mathbf{C}_{yy}}) \sin \tilde{\theta}_t + \sigma_{k+1} \|\eta_t\|_{\mathbf{C}_{yy}} + (\sigma_1 + \beta + \|\eta_t\|_{\mathbf{C}_{yy}}) \|\xi_t\|_{\mathbf{C}_{xx}}}{\cos \tilde{\theta}_t}}{\sigma_k^2 - \frac{c\beta \sigma_1 \sin \tilde{\theta}_t + c\beta(\sigma_1 + \beta + \|\eta_t\|_{\mathbf{C}_{yy}}) \sin \tilde{\theta}_t + \sigma_1 \|\eta_t\|_{\mathbf{C}_{yy}} + (\sigma_1 + \beta + \|\eta_t\|_{\mathbf{C}_{yy}}) \|\xi_t\|_{\mathbf{C}_{xx}}}{\cos \tilde{\theta}_t}} \\ & \leq \frac{\sigma_{k+1}^2 + c\beta \sigma_{k+1} + c\beta(\sigma_1 + \beta + \frac{\sigma_k^2 - \sigma_{k+1}^2}{12}) + (2\sigma_1 + \frac{\sigma_k^2 - \sigma_{k+1}^2}{12}) \frac{\sigma_k^2 - \sigma_{k+1}^2}{12}}{\sigma_k^2 - c\beta \sigma_{k+1} \tan \tilde{\theta}_{t-1} - c\beta(\sigma_1 + \beta + \frac{\sigma_k^2 - \sigma_{k+1}^2}{12}) \tan \tilde{\theta}_{t-1} - (2\sigma_1 + \frac{\sigma_k^2 - \sigma_{k+1}^2}{12}) \frac{\sigma_k^2 - \sigma_{k+1}^2}{12}} \tan \theta_t \\ & \leq \frac{\sigma_{k+1}^2 + 4c\beta \sigma_1 + \frac{\sigma_k^2 - \sigma_{k+1}^2}{4}}{\sigma_k^2 - 4c\beta \sigma_1 - \frac{\sigma_k^2 - \sigma_{k+1}^2}{4}} \tan \theta_t \\ & = \frac{\sigma_k^2 + 3\sigma_{k+1}^2 + 16c\beta \sigma_1}{3\sigma_k^2 + \sigma_{k+1}^2 - 16c\beta \sigma_1} \tan \theta_t \\ & \leq \exp\left\{-\frac{\sigma_k^2 - \sigma_{k+1}^2 - 16c\beta \sigma_1}{2\sigma_k^2 - 8c\beta \sigma_1}\right\} \tan \theta_t. \end{aligned}$$

□

**Lemma 1** [1]

$\sin \theta_{\max}(\Phi, \mathbf{U}) = \|\mathbf{U}_{\perp}^{\top} \mathbf{C}_{xx} \Phi\|_2$  and  $\tan \theta_{\max}(\Phi, \mathbf{U}) = \|\mathbf{U}_{\perp}^{\top} \mathbf{C}_{xx} \Phi (\mathbf{U}^{\top} \mathbf{C}_{xx} \Phi)^{-1}\|_2$  if  $\mathbf{U}^{\top} \mathbf{C}_{xx} \Phi$  is invertible.

**Lemma 2** For the least-squares subproblem, let  $\Phi_t^* \triangleq \arg \min l_t(\Phi) = \mathbf{C}_{xx}^{-1} \mathbf{C}_{xy} \Psi_{t-1}$  and  $\epsilon_t(\Phi) = l_t(\Phi) - l_t(\Phi_t^*)$ . We then have  $\epsilon_t(\Phi) = \frac{1}{2} \|\Phi - \Phi_t^*\|_{\mathbf{C}_{xx}, F}^2$ . Particularly,  $\epsilon_t(\tilde{\Phi}_0) \leq 2k\sigma_1^2 \tan^2 \theta_{t-1}$ , where  $\|\mathbf{A}\|_{\Lambda, F} = \|\Lambda^{1/2} \mathbf{A}\|_F$  and  $\tilde{\Phi}_0 = \Phi_{t-1}(\Phi_{t-1}^{\top} \mathbf{C}_{xx} \Phi_{t-1})^{-1}(\Phi_{t-1}^{\top} \mathbf{C}_{xy} \Psi_{t-1})$ . In addition, Nesterov's accelerated gradient descent takes  $O(\text{nnz}(\mathbf{Y}) + \text{nnz}(\mathbf{X})\sqrt{\kappa(\mathbf{C}_{xx})} \log \frac{\epsilon_t(\tilde{\Phi}_0)}{\epsilon_t(\tilde{\Phi}_t)})$  complexity to reach sub-optimality  $\epsilon_t(\tilde{\Phi}_t)$ .

**Proof** Noting that  $l_t(\Phi_t^*) = -\frac{1}{2} \text{tr}(\Psi_{t-1}^{\top} \mathbf{C}_{xy} \mathbf{C}_{xx}^{-1} \mathbf{C}_{xy} \Psi_{t-1}) + \frac{1}{2n} \|\mathbf{Y}^{\top} \Psi_{t-1}\|_F^2$ , we have that

$$\begin{aligned} \frac{1}{2} \|\Phi - \Phi_t^*\|_{\mathbf{C}_{xx}, F}^2 &= \frac{1}{2} \text{tr}((\Phi - \Phi_t^*)^{\top} \mathbf{C}_{xx} (\Phi - \Phi_t^*)) \\ &= \text{tr}(\frac{1}{2} \Phi^{\top} \mathbf{C}_{xx} \Phi - \Phi^{\top} \mathbf{C}_{xx} \Phi_t^* + \frac{1}{2} (\Phi_t^*)^{\top} \mathbf{C}_{xx} \Phi_t^*) \\ &= \text{tr}(\frac{1}{2} \Phi^{\top} \mathbf{C}_{xx} \Phi - \Phi^{\top} \mathbf{C}_{xx} \Psi_{t-1} + \frac{1}{2} \Psi_{t-1}^{\top} \mathbf{C}_{xy} \mathbf{C}_{xx} \mathbf{C}_{xy} \Psi_{t-1}) \\ &= l_t(\Phi) - l_t(\Phi_t^*) = \epsilon_t(\Phi). \end{aligned}$$

Let  $h_t(\Gamma) = l_t(\Phi \Gamma) - l_t(\Phi_t^*)$ . Setting  $\frac{\partial}{\partial \Gamma} h_t(\Gamma) = \Phi_{t-1}^{\top} \mathbf{C}_{xx} \Phi_{t-1} \Gamma - \Phi_{t-1}^{\top} \mathbf{C}_{xy} \Psi_{t-1} = 0$  yields the optimal  $\Gamma^* = (\Phi_{t-1}^{\top} \mathbf{C}_{xx} \Phi_{t-1})^{-1} \Phi_{t-1}^{\top} \mathbf{C}_{xy} \Psi_{t-1}$ . That is,  $\tilde{\Phi}_0 = \Phi_{t-1} \Gamma^*$ . If we use  $\tilde{\Gamma}$  such that  $\mathbf{U}^{\top} \mathbf{C}_{xx} \Phi_{t-1} \tilde{\Gamma} - \mathbf{U}^{\top} \mathbf{C}_{xy} \Psi_{t-1} = 0$ , i.e.,

$$\tilde{\Gamma} = (\mathbf{U}^{\top} \mathbf{C}_{xx} \Phi_{t-1})^{-1} \mathbf{U}^{\top} \mathbf{C}_{xy} \Psi_{t-1} = (\mathbf{U}^{\top} \mathbf{C}_{xx} \Phi_{t-1})^{-1} \Sigma \mathbf{V}^{\top} \mathbf{C}_{yy} \Psi_{t-1},$$

we then have that

$$\begin{aligned} \epsilon_t(\tilde{\Phi}_0) &\leq \epsilon_t(\Phi_{t-1} \tilde{\Gamma}) \\ &= \frac{1}{2} \|\Phi_{t-1} \tilde{\Gamma} - \Phi_t^*\|_{\mathbf{C}_{xx}, F}^2 \\ &= \frac{1}{2} (\|\mathbf{U}^{\top} \mathbf{C}_{xx} (\Phi_{t-1} \tilde{\Gamma} - \mathbf{C}_{xx}^{-1} \mathbf{C}_{xy} \Psi_{t-1})\|_F^2 + \|\mathbf{U}_{\perp}^{\top} \mathbf{C}_{xx} (\Phi_{t-1} \tilde{\Gamma} - \mathbf{C}_{xx}^{-1} \mathbf{C}_{xy} \Psi_{t-1})\|_F^2) \\ &= \frac{1}{2} \|\mathbf{U}_{\perp}^{\top} \mathbf{C}_{xx} (\Phi_{t-1} \tilde{\Gamma} - \mathbf{C}_{xx}^{-1} \mathbf{C}_{xy} \Psi_{t-1})\|_F^2 = \frac{1}{2} \|\mathbf{U}_{\perp}^{\top} \mathbf{C}_{xx} \Phi_{t-1} \tilde{\Gamma} - \mathbf{U}_{\perp}^{\top} \mathbf{C}_{xy} \Psi_{t-1}\|_F^2 \\ &= \frac{1}{2} \|\mathbf{U}_{\perp}^{\top} \mathbf{C}_{xx} \Phi_{t-1} \tilde{\Gamma} - \Sigma_{\perp}^{\top} \mathbf{V}_{\perp}^{\top} \mathbf{C}_{yy} \Psi_{t-1}\|_F^2 \quad (\text{by Equation(1)}) \\ &\leq k(\|\mathbf{U}_{\perp}^{\top} \mathbf{C}_{xx} \Phi_{t-1}\|_2^2 \|\tilde{\Gamma}\|_2^2 + \|\Sigma_{\perp}\|_2^2 \|\mathbf{V}_{\perp}^{\top} \mathbf{C}_{yy} \Psi_{t-1}\|_2^2) \\ &\leq k(\frac{\sigma_1^2 \sin^2 \theta_{\max}(\Phi_{t-1}, \mathbf{U})}{\cos^2 \theta_{\max}(\Phi_{t-1}, \mathbf{U})} + \sigma_{k+1}^2 \sin^2 \theta_{\max}(\Psi_{t-1}, \mathbf{V})) \\ &\leq k(\sigma_1^2 \tan^2 \theta_{\max}(\Phi_{t-1}, \mathbf{U}) + \sigma_{k+1}^2 \tan^2 \theta_{\max}(\Psi_{t-1}, \mathbf{V})) \\ &\leq 2k\sigma_1^2 \tan^2 \theta_{t-1}. \end{aligned}$$

The proof completes by noting that  $l_t(\Phi)$  is  $\lambda_{\max}(\mathbf{C}_{xx})$ -smooth and  $\lambda_{\min}(\mathbf{C}_{xx})$ -strongly convex.  $\square$

**Additional Experiments** The convergence curves of all the ALS algorithms in terms of  $(f^* - f)/f^* \triangleq (\text{tr}(\Sigma) - \text{tr}(\Phi_t^\top C_{xy} \Psi_t))/\text{tr}(\Sigma)$  are given in Figure 1. Figure 2 shows the comparison of the ALS algorithms with the shift-and-invert preconditioning based method in the vector setting. Figure 3 reports the performance of the ALS algorithms with varying block sizes. Figure 4 shows the convergence results on the Youtube dataset.

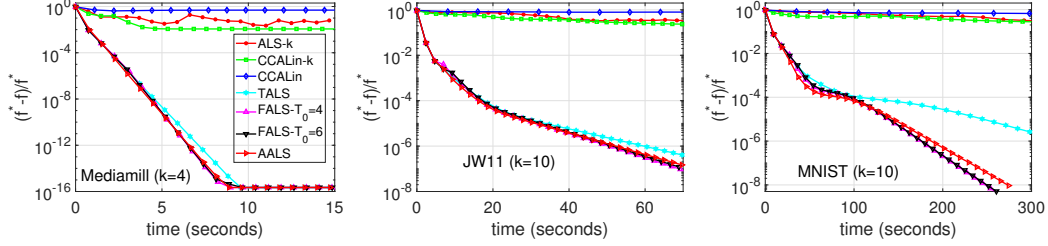

Figure 1: Performance of the ALS algorithms in terms of  $(f^* - f)/f^*$ .

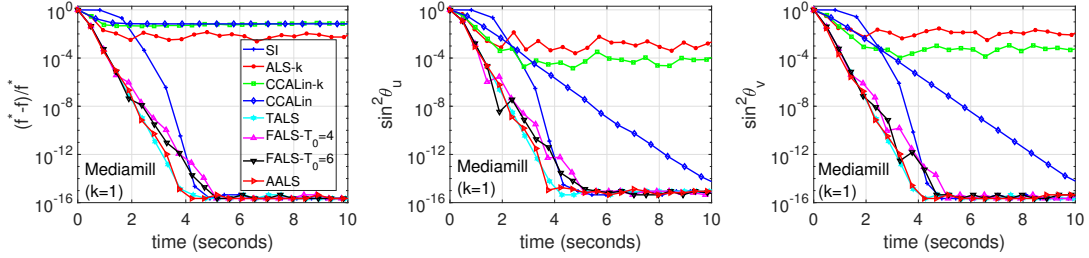

Figure 2: Comparison with the shift-and-invert preconditioning based methods.

## References

- [1] Rong Ge, Chi Jin, Sham M. Kakade, Praneeth Netrapalli, and Aaron Sidford. Efficient algorithms for large-scale generalized eigenvector computation and canonical correlation analysis. In *International Conference on Machine Learning*, pages 2741–2750, 2016.
- [2] Weiran Wang, Jiale Wang, Dan Garber, and Nati Srebro. Efficient globally convergent stochastic optimization for canonical correlation analysis. In *Advances in Neural Information Processing Systems 29: Annual Conference on Neural Information Processing Systems 2016, December 5-10, 2016, Barcelona, Spain*, pages 766–774, 2016.

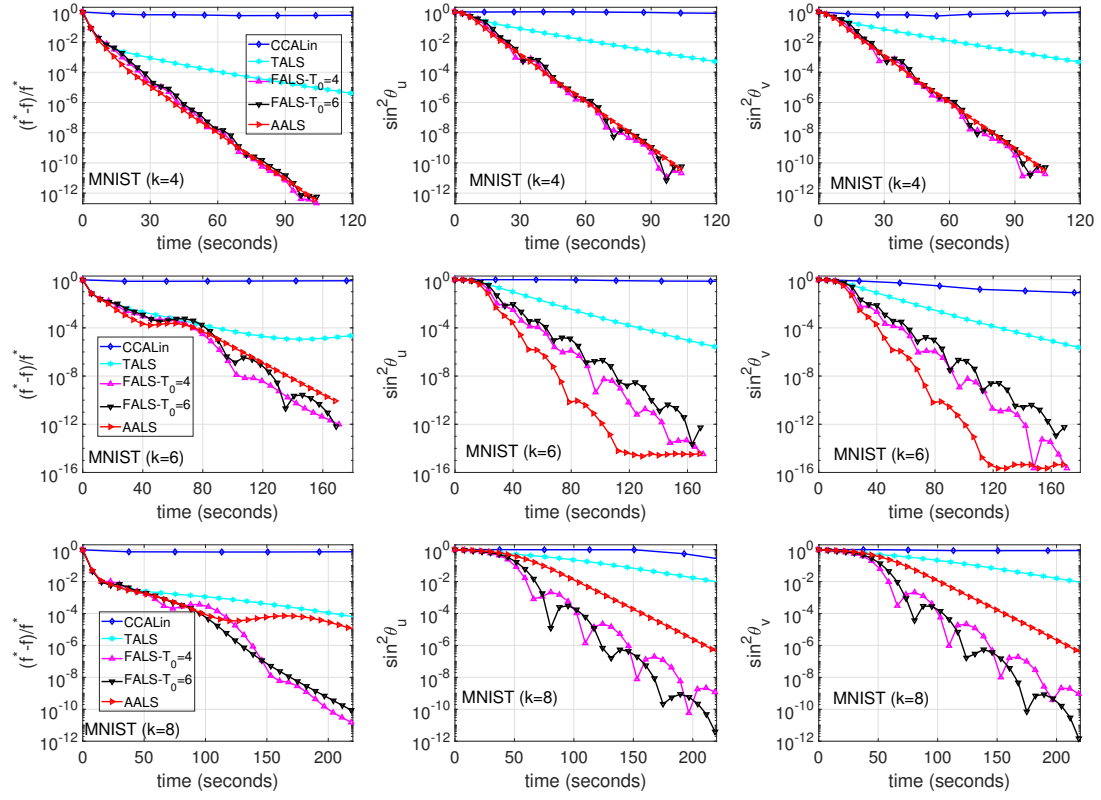

Figure 3: Performance of the ALS algorithms with varying block sizes.

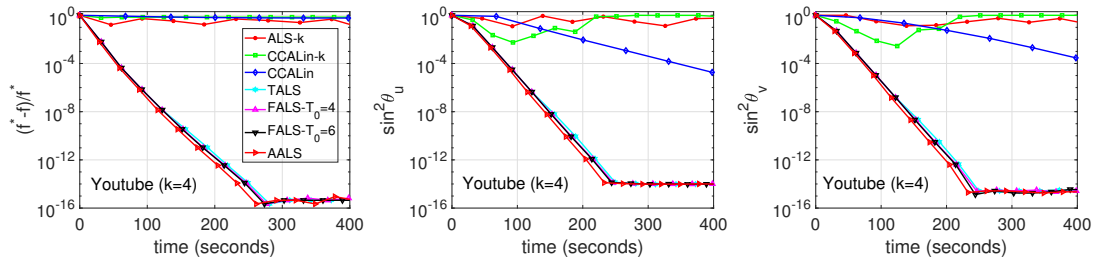

Figure 4: Performance of the ALS algorithms on Youtube.
